# Supplementary material
Source: Research Square preprint supplement (doi:10.21203/rs.3.rs-9399914/v1)
Supplement: Supplementary file 1 [file d514e741084cb9a10ec496bc.pdf]

<https://nenow.in/north-east-news/dhakuwakhana-muga-rich-zone-north-east.html>

<https://indianexpress.com/article/north-east-india/assam/muga-waste-finds-a-new-thread-of-life/>

<https://earthjournalism.net/stories/climate-change-unravels-the-golden-thread-of-assam>

<https://www.thehindu.com/features/metroplus/fashion/drape-a-piece-of-pride/article4481756.ece>

<https://www.thehindu.com/news/national/karnataka/indian-silk-industry-hopes-to-become-self-reliant-by-2020/article7885584.ece>

[https://www.researchgate.net/publication/329783320\\_Handloom\\_Census\\_of\\_India\\_2009-10](https://www.researchgate.net/publication/329783320_Handloom_Census_of_India_2009-10)

[https://www.researchgate.net/publication/343657646\\_Women's\\_Empowerment\\_through\\_the\\_Silk\\_Industry\\_of\\_Assam\\_India\\_and\\_its\\_underlying\\_Economy](https://www.researchgate.net/publication/343657646_Women's_Empowerment_through_the_Silk_Industry_of_Assam_India_and_its_underlying_Economy)

<https://www.bing.com/ck/a?!&&p=e4e4c873d850bcf220324565e8f4e091b0f1b9269b551070a89102d53044af53JmltdHM9MTc3NzQyMDgwMA&ptn=3&ver=2&hsh=4&fclid=301b666b-bb8-6189-21ec-7503ba7b6048&u=a1aHR0cHM6Ly9jc2luZ292LmluL3NpbGstc2VyaWN1bHR1cmUvc2VyaWN1bHR1cmU>
